# Supplementary material for: Vitamin B12 and folate levels in healthy Swiss senior citizens: a prospective study evaluating reference intervals and decision limits
Source: Springer Nature journal article supplement (doi:10.1186/s12877-015-0060-x), 2015-07-10

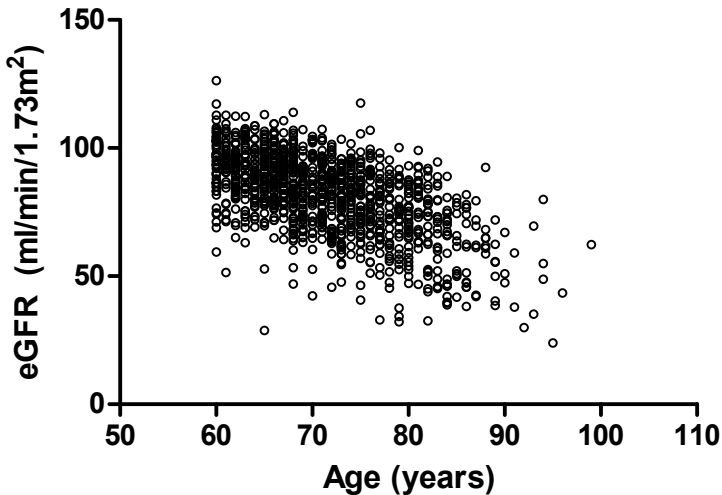

Supplement: MOESM1 [file 9738652]
